# Supplementary material
Source: PubMed Central journal article supplement (PMC6906788)
Supplement: ao9b02401_si_001.pdf [file ao9b02401_si_001.pdf]

## Role of Cellular Retention and Intracellular State in Controlling Gene Delivery Efficiency of Multiple Nonviral Carriers

Ujjwal Ranjan Dahiya<sup>1,2</sup>, Sarita Mishra<sup>1,2</sup>, Sabyasachi Chattopadhyay<sup>1</sup>, Anupama Kumari<sup>1,2</sup>, Apurva Gangal<sup>1</sup>, Munia Ganguli<sup>1,2\*</sup>

<sup>1</sup>CSIR - Institute of Genomics and Integrative Biology, Mathura Road, New Delhi 110025, India.

<sup>2</sup>Academy of Scientific and Innovative Research (AcSIR), Anusandhan Bhawan, 2 Rafi Marg, New Delhi 110001, India.

\* Address for correspondence:

Munia Ganguli,

Lab-219, Discovery Genomics Building, CSIR-Institute of Genomics and Integrative Biology, Mathura Road, New Delhi- 110025.

Tel: 011-29879225

Email id: [mganguli@igib.res.in](mailto:mganguli@igib.res.in), [mganguli@igib.in](mailto:mganguli@igib.in)

# Supplementary Information:

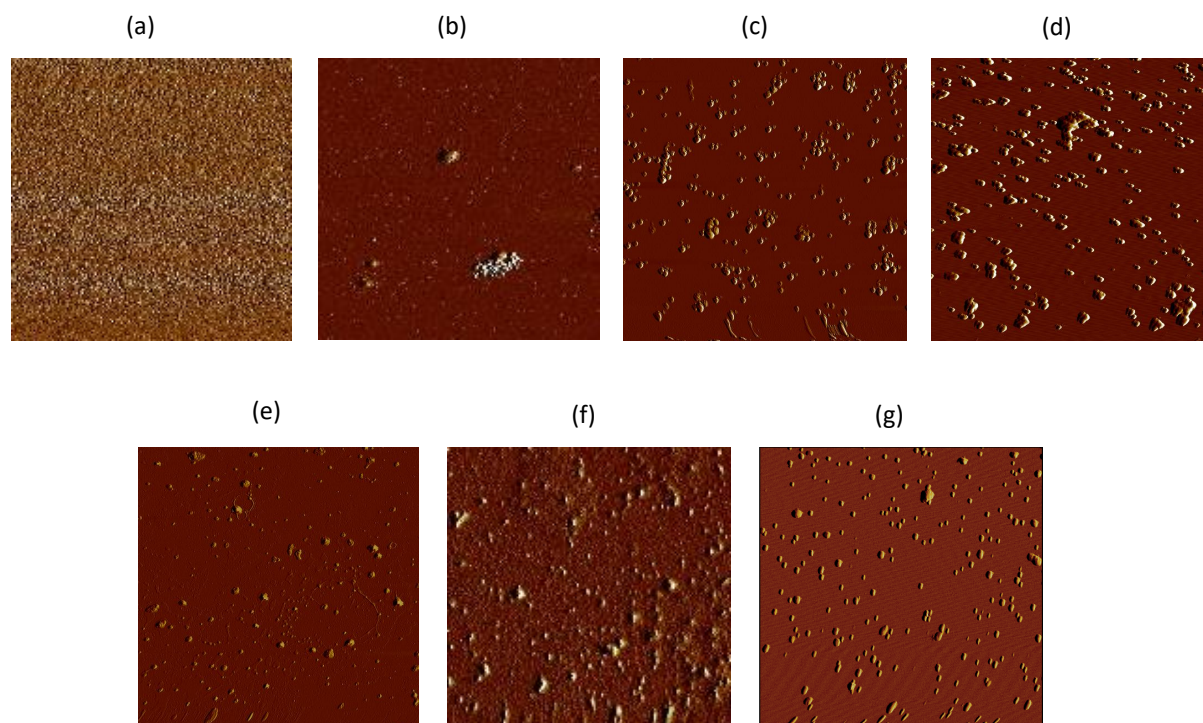

Figure S1: Characterization of shape and size of different nanocomplexes prepared at charge ratio Z (+/-) 5 using AFM (Atomic force microscopy): (a) control (bare mica) (b) M1 (c) M3 (d) M4 (e) Lipofectamine (f) M9 and (g) PEI nanocomplexes. Amplitude images of area 10 $\mu$ m x 10 $\mu$ m are shown in panels for different nanocomplexes.

| Primer         | Sequences            |
|----------------|----------------------|
| Forward primer | AGTCCCGTTGATTTTGGTGC |
| Reverse primer | CAGTACATCAATGGGCGTGG |

Table S1: Primer sequences designed for qPCR, against backbone of pMIR plasmid DNA.

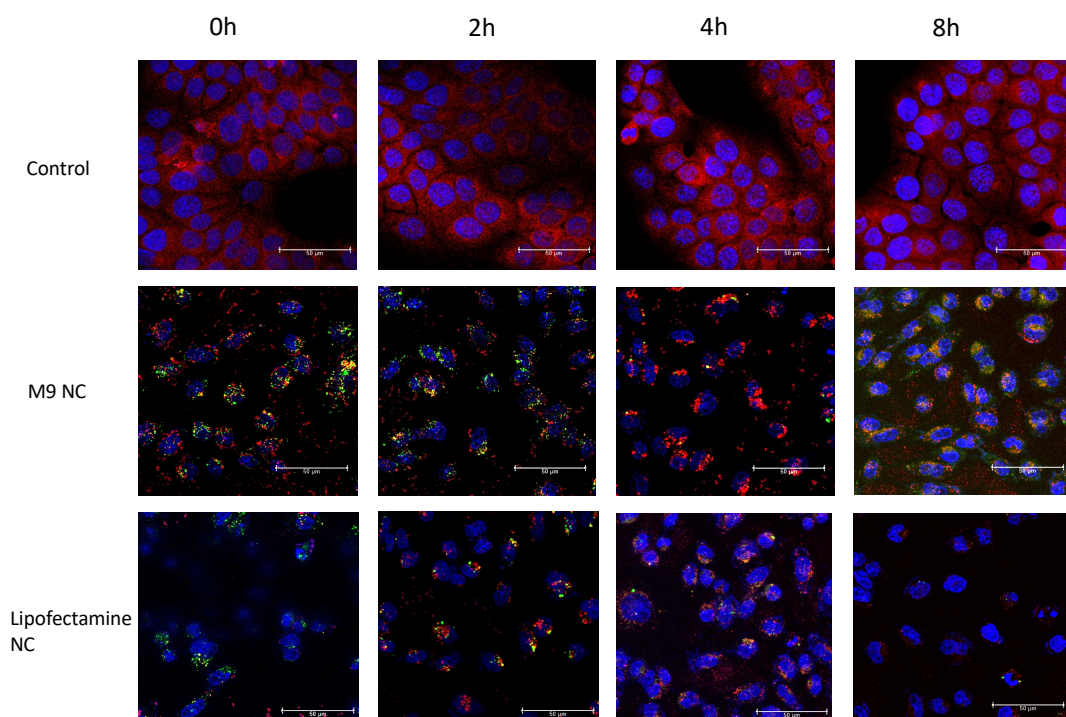

Figure S2: Confocal Imaging for tracking nanocomplex retention with time: B16-F10 cells were incubated with FITC labeled M9 and Lipofectamine nanocomplexes (NC) for 4h, followed by media change and fixing cells at 0, 2, 4 and 8h. Nucleus was stained with Hoechst and plasma membrane with Cell Mask orange plasma.

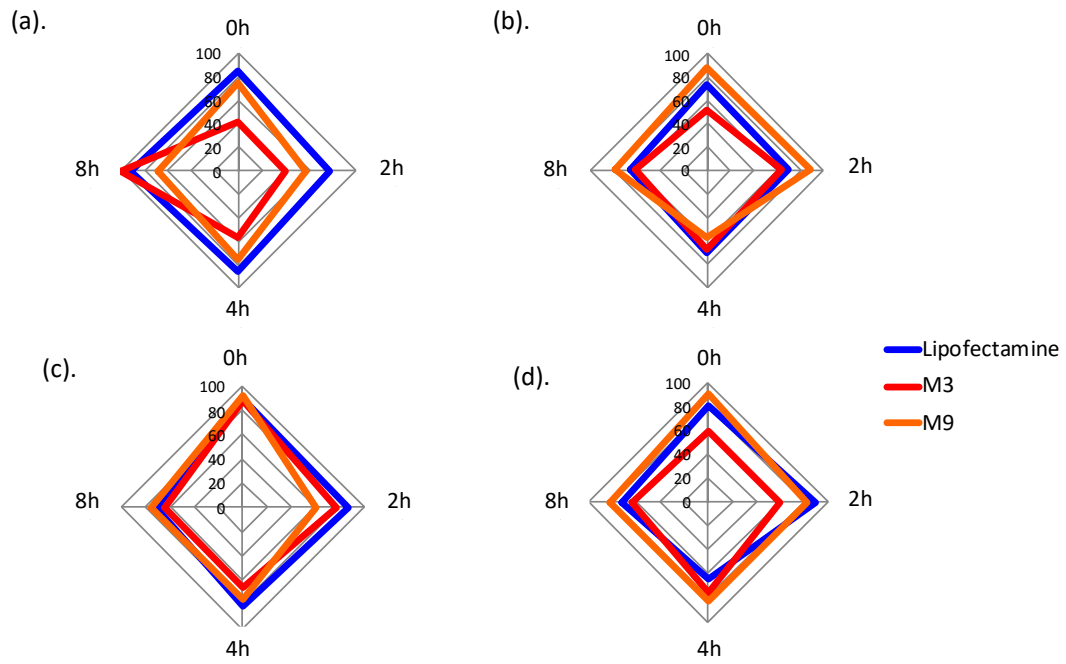

Figures S3: qPCR-based plasmid DNA release study: Amount of complexed plasmid DNA as percentage of total plasmid DNA at each time point is plotted in quadrilateral plots: (a) CHOK-1 (b) HaCaT (c) B16-F10 and (d) HEK-293 cells.



(a)

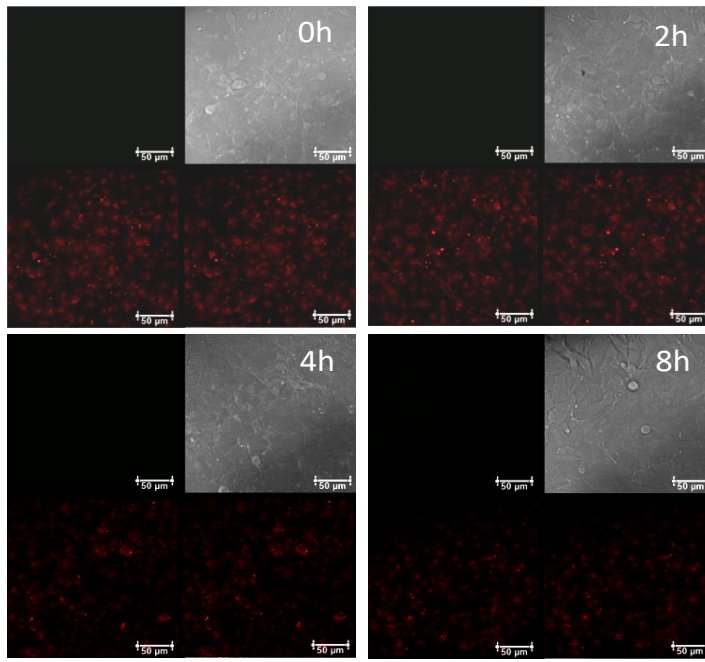

(b)

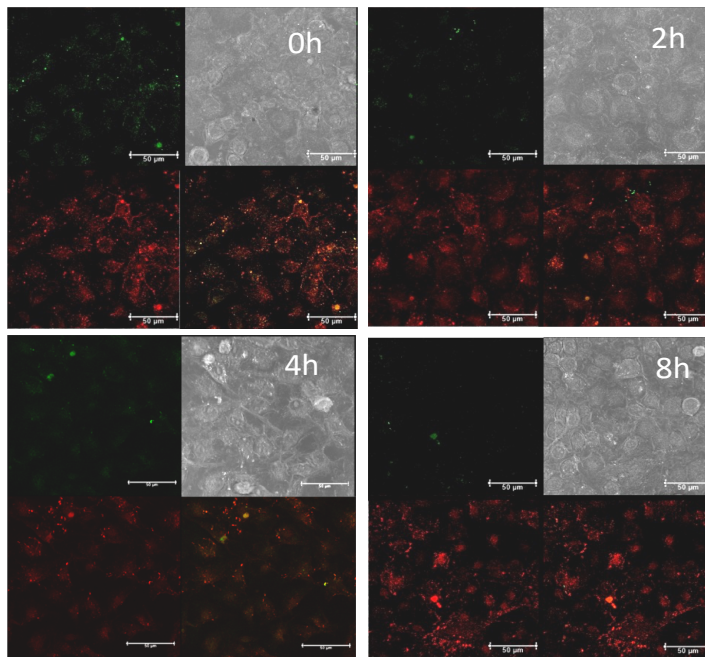

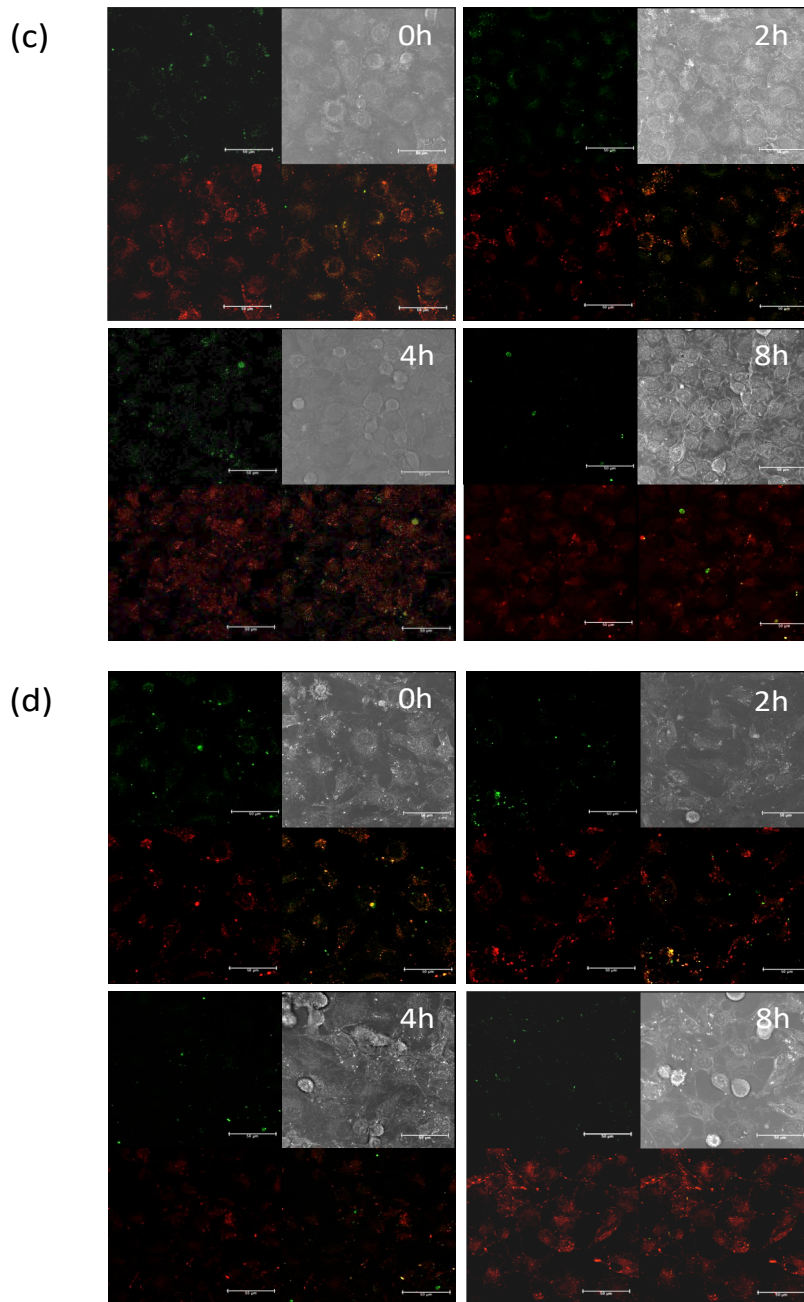

Figure S4: Lysosomal co-localization of nanocomplexes (NCs) with time: NCs formed using FITC-labeled DNA (green) were studied for co-localization with Lysosome (red labeled with Lysotracker Red) in B16-F10 cell line at 0, 2, 4 and 8h: (a) Control, (b) M3-NC, (c) M9-NC and (d) Lipofectamine NC.

| Nanocomplexes    | 0h              | 2h              | 4h              | 8h              |
|------------------|-----------------|-----------------|-----------------|-----------------|
| M3 NC            | $0.51 \pm 0.05$ | $0.35 \pm 0.05$ | $0.30 \pm 0.04$ | $0.17 \pm 0.04$ |
| M9 NC            | $0.29 \pm 0.04$ | $0.31 \pm 0.03$ | $0.28 \pm 0.06$ | $0.22 \pm 0.00$ |
| Lipofectamine NC | $0.38 \pm 0.08$ | $0.40 \pm 0.04$ | $0.18 \pm 0.02$ | $0.34 \pm 0.05$ |

Table S2: Lysosomal co-localization of NCs with time was studied using confocal microscopy and respective Pearson's correlation coefficient estimated from three fields (~50 cells) is reported in Table (Experiments were performed in two independent sets. Data is represented in mean  $\pm$  standard deviation).

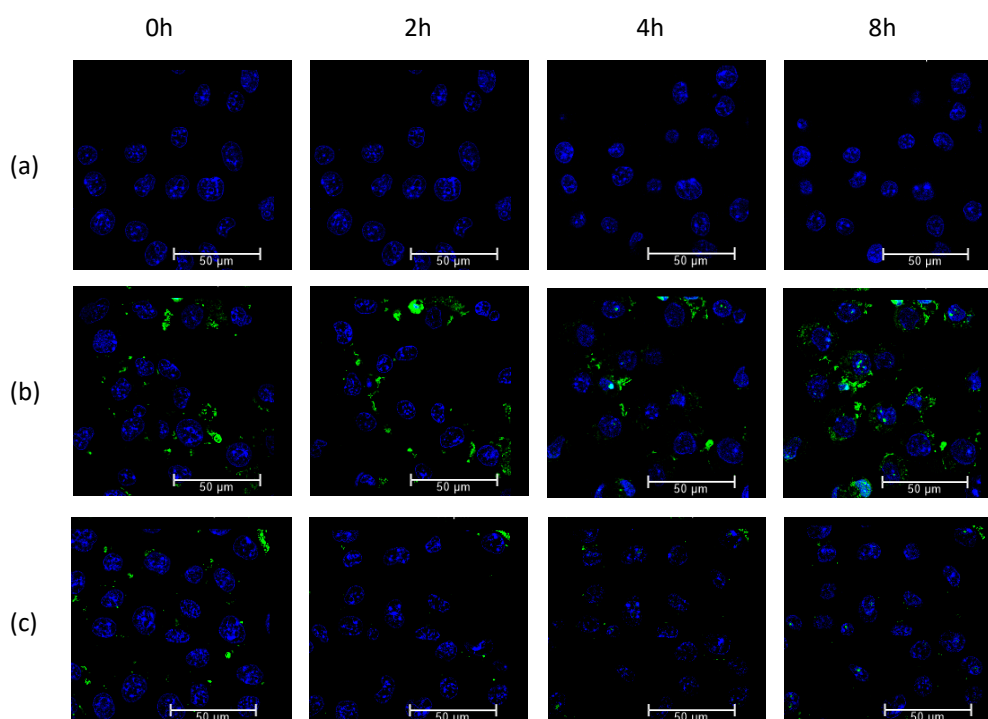

Figure S5: Nuclear co-localization of M9 and Lipofectamine nanocomplexes: Live cells confocal imaging was performed for studying nuclear localization of nanocomplexes for 8h. FITC-labeled nanocomplexes were incubated for 4h and imaging was done after media change: (a) control (b) M9 nanocomplexes (c) Lipofectamine nanocomplexes. B16-F10 Cells were imaged with same field in focus for 8h.

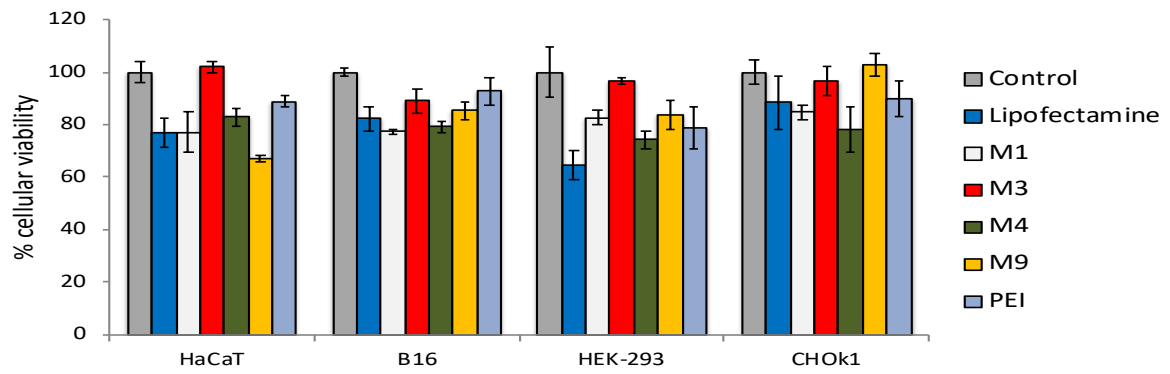

Figure S6: Cellular viability 24h after incubating the cells with the nanocomplexes. MTT assay was performed to assess the percentage viable cells with respect to control.
